# Supplementary material
Source: PubMed Central journal article supplement (PMC6640923)
Supplement: ao7b00103_si_001.pdf [file ao7b00103_si_001.pdf]

# Rapidly Responding pH and Temperature-Responsive Poly (*N*-Isopropylacrylamide)-Based Microgels and Assemblies

*Andrews Ahiabu<sup>†</sup> and Michael J. Serpe\*<sup>†</sup>*

<sup>†</sup>*Department of Chemistry, University of Alberta, Edmonton, Alberta, Canada T6G 2G2*

\*email: michael.serpe@ualberta.ca

**Scheme S1.** Synthesis of Butylacrylic acid (BAAc)

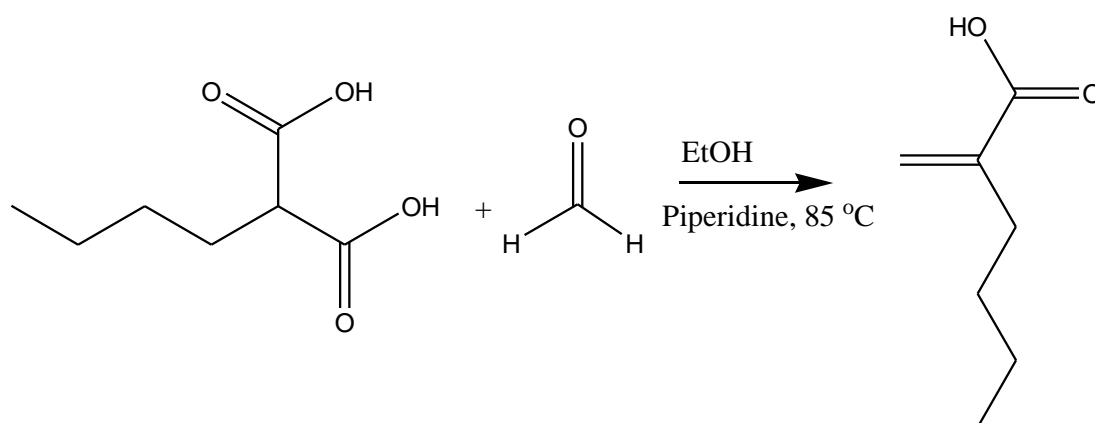

**Table S1.** Distinctive IR functional groups and their representative vibrational frequencies for both BAAC monomer and pNIPAm-co-BAAC microgels

| Functional group           | Wavenumbers (cm <sup>-1</sup> ) |
|----------------------------|---------------------------------|
| N-H stretching             | 3305                            |
| CH <sub>3</sub> stretching | 2971                            |
| O-H stretching             | 2960                            |
| =C-H stretching            | 2875                            |
| -C=O (carboxyl stretching) | 1697                            |
| Amide I -C=O stretching    | 1649                            |
| C=C stretching             | 1629                            |
| Amide II - NH bending      | 1530                            |
| C-H bending                | 1459                            |
| C-H bending (from BAAC)    | 1442                            |
| Isopropyl stretching       | 1387                            |
| C-O stretching (from BAAC) | 1225                            |
| C-O stretching             | 1173                            |
| =C-H bending               | 951                             |

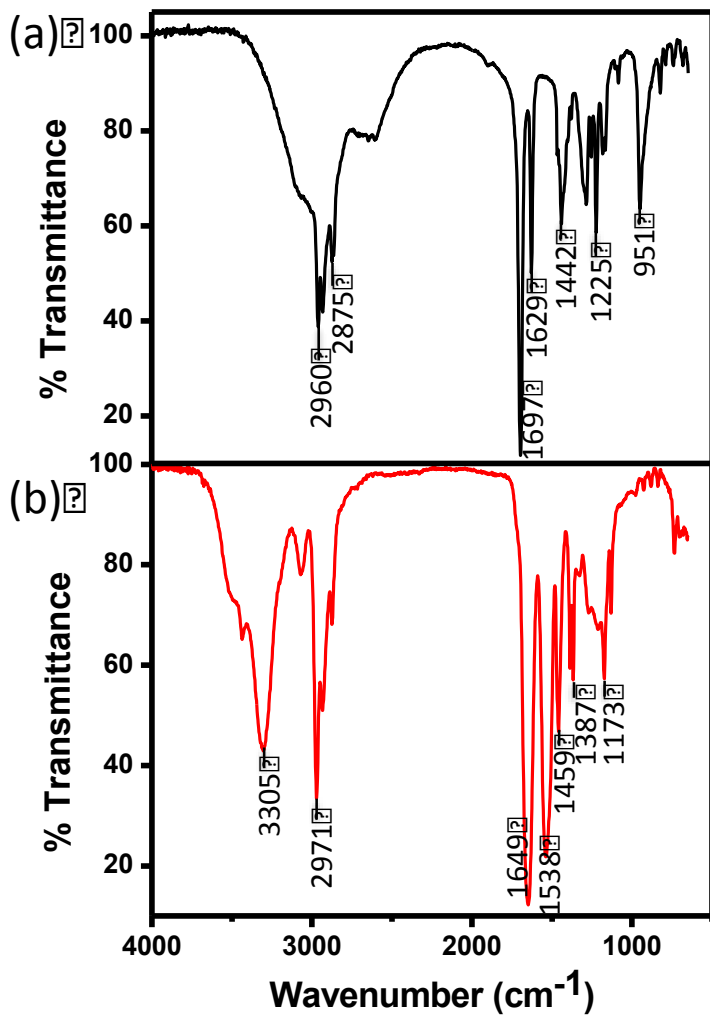

Figure S1. FTIR spectra of (a) BAAC and (b) pNIPAm-co-BAAC

## Laboratory

---

---

---

127.0764  
(M-H)-

Figure S2: Mass spectrum of BuAAc, with the molecular ion peak of (M-H) at 127.0764.

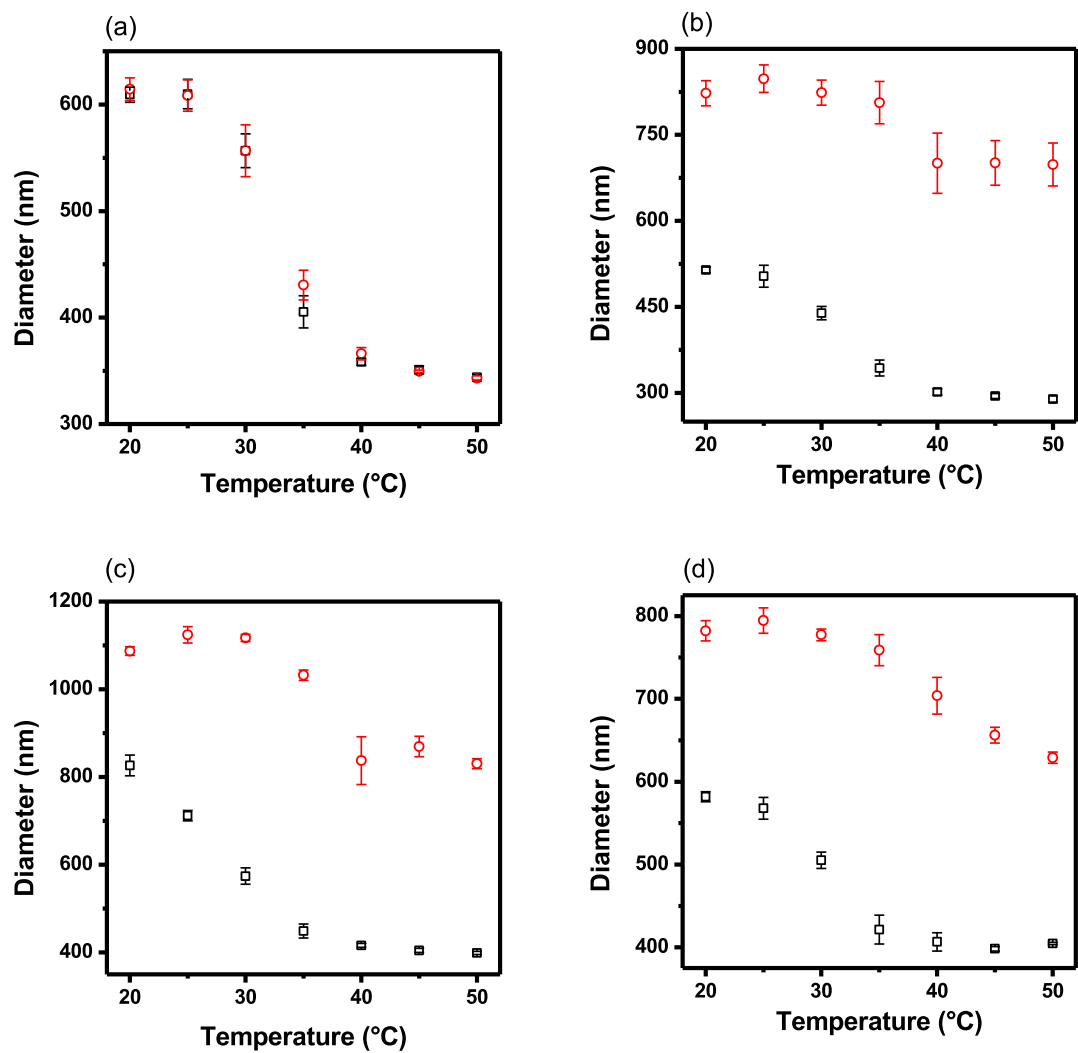

Figure S3. Microgel diameter as a function of solution temperature at the indicated solution pHs. (a) pNIPAm, (b) pNIPAm-co-MAAc, (c) pNIPAm-co-EAAc, and (d) pNIPAm-co-BAAc at ( $\square$ ) pH 3 and ( $\circ$ ) pH 10.

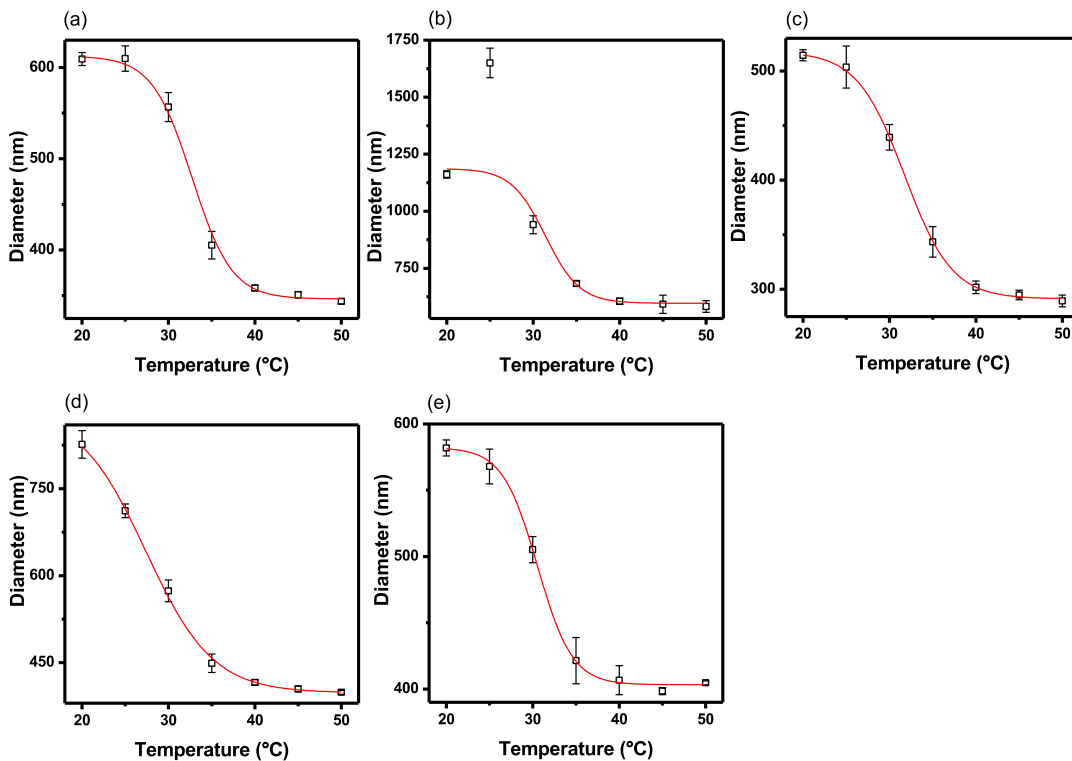

**Figure S4.** Microgel diameter as a function of temperature for (a) pNIPAm, (b) pNIPAm-co-AAc, (c) pNIPAm-co-MAAc, (d) pNIPAm-co-EAAc, and (e) pNIPAm-co-BAAc microgels. Data points represent average of three measurements with error bars representing the standard deviation. Data were fit to a Boltzmann sigmoidal curve fitting function using OriginLab program software and the LCST determined.

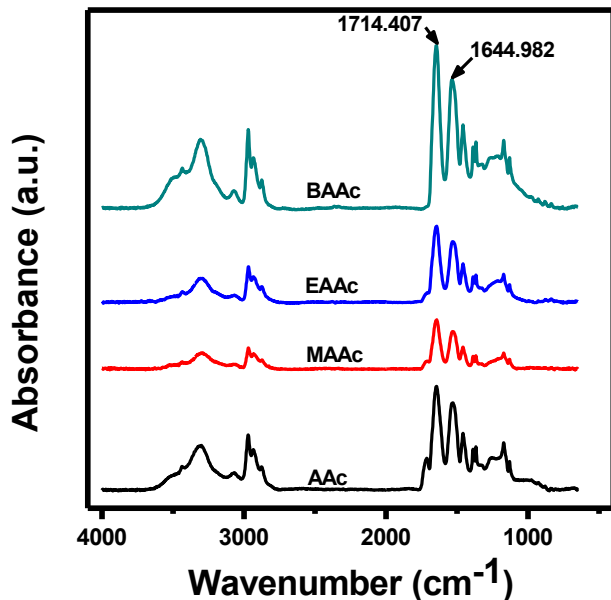

Figure S5. FTIR spectra of pNIPAm-co-BAAc, pNIPAm-co-EAAc, pNIPAm-co-MAAc, and pNIPAm-co-AAc. The ratio of absorbance at  $1714.407\text{ cm}^{-1}$  (carboxylic acid  $\text{-C=O}$ ) to the absorbance at  $1644.982\text{ cm}^{-1}$  (amide I  $\text{-C=O}$ ) was used to estimate the amount of comonomer present in the microgels.

**Table S2.** Comonomer feed and composition in microgel.

| Comonomer                | Amount added (g) | Amount in microgel (g) <sup>1</sup> | $\text{-C=O}^{2a}$ | $\text{-C=O}^{2b}$ | Ratio <sup>2c</sup> |
|--------------------------|------------------|-------------------------------------|--------------------|--------------------|---------------------|
| Acrylic acid (AAc)       | 0.1011           | 0.0922                              | 0.083              | 0.274              | 0.303               |
| Methacrylic acid (MAAc)  | 0.1207           | 0.0810                              | 0.021              | 0.13               | 0.162               |
| Ethylacrylic acid (EAAc) | 0.1405           | 0.0869                              | 0.022              | 0.2                | 0.110               |
| Butylacrylic acid (BAAc) | 0.1798           | 0.0229                              | 0.003              | 0.43               | 0.007               |

<sup>1</sup>Amount estimated from potentiometric and conductometric titration. <sup>2a</sup>Absorbance at  $1714.407\text{ cm}^{-1}$  (carboxylic acid  $\text{-C=O}$ ), <sup>2b</sup>absorbance at  $1644.982\text{ cm}^{-1}$  (amide I  $\text{-C=O}$ ), <sup>2c</sup>ratio of absorbance at  $1714.407\text{ cm}^{-1}$  to  $1644.982\text{ cm}^{-1}$ .

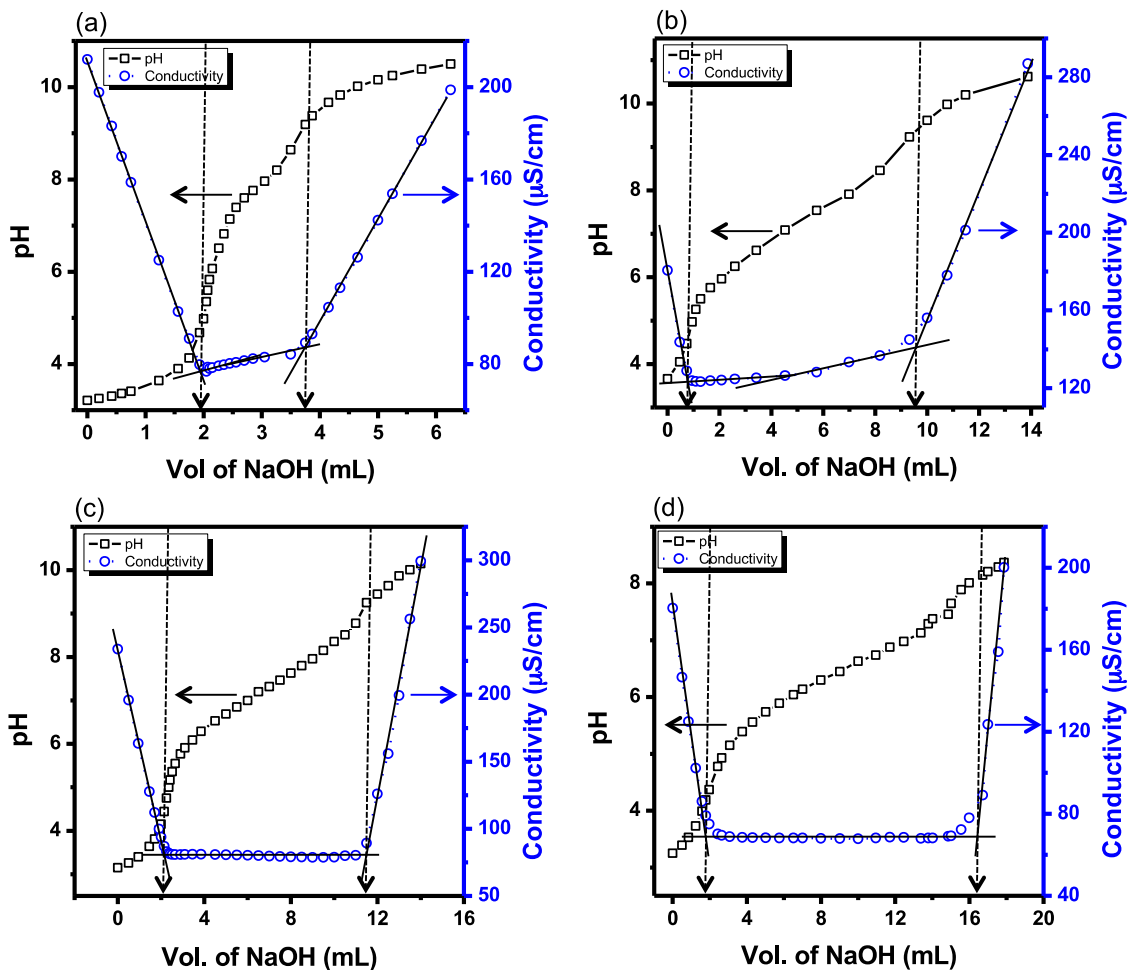

Figure S6. Potentiometric and conductometric titration of (a) pNIPAm-co-BAAc, (b) pNIPAm-co-EAAc, (c) pNIPAm-co-MAAc, and (d) pNIPAm-co-AAc. Initial pH of each microgel solution was reduced to about 3 by addition of 1.0 M HCl and titrated with 0.0101 M NaOH. The first minima on the conductivity measurement curves (first arrow) corresponds to the volume of NaOH required to neutralize any excess strong acid, while the second minima indicate where all the acid groups in the microgels were neutralized.
